# Supplementary material for: Dissecting the heterogeneity of DENV vaccine-elicited cellular immunity using single-cell RNA sequencing and metabolic profiling
Source: PubMed Central journal article supplement (PMC6694189; doi:10.1038/s41467-019-11634-7), 2019-08-14
Supplement: 41467_2019_11634_MOESM1_ESM.pdf [file 41467_2019_11634_MOESM1_ESM.pdf]

Supplementary Information for:

**Dissecting the heterogeneity of DENV vaccine-elicited cellular immunity using single-cell RNA sequencing and metabolic profiling**

Waickman et al

# Supplementary Figure 1

A.

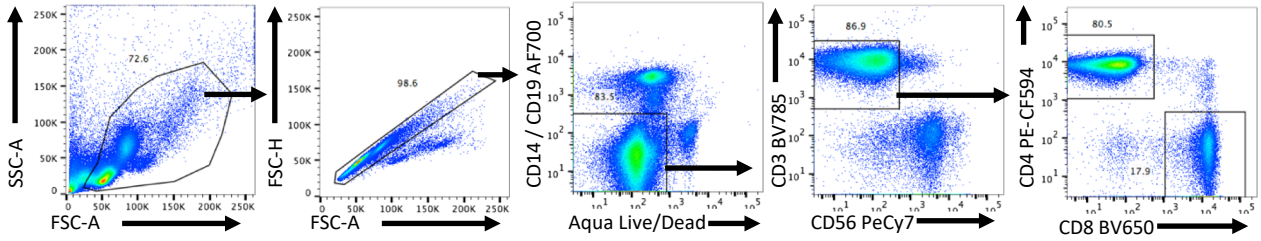

B.

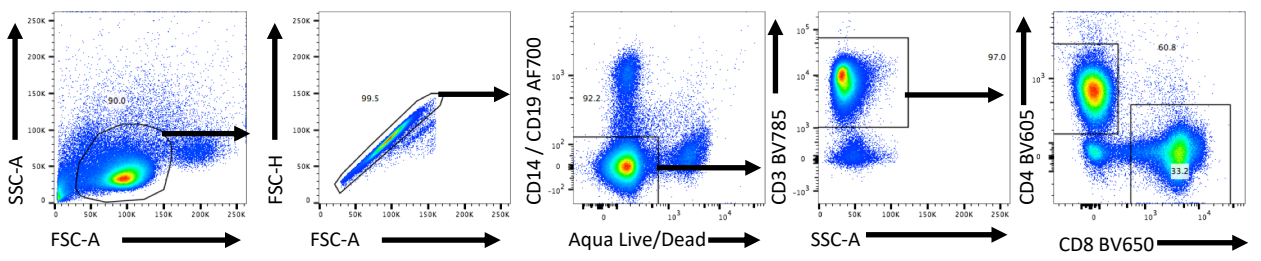

C.

D.

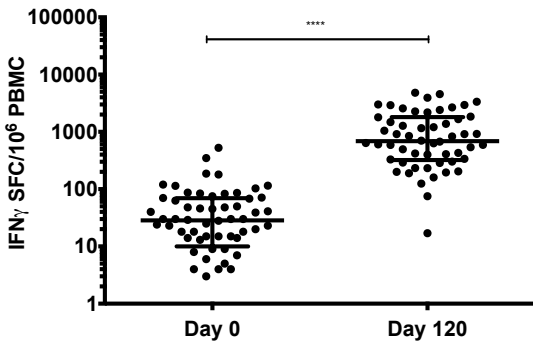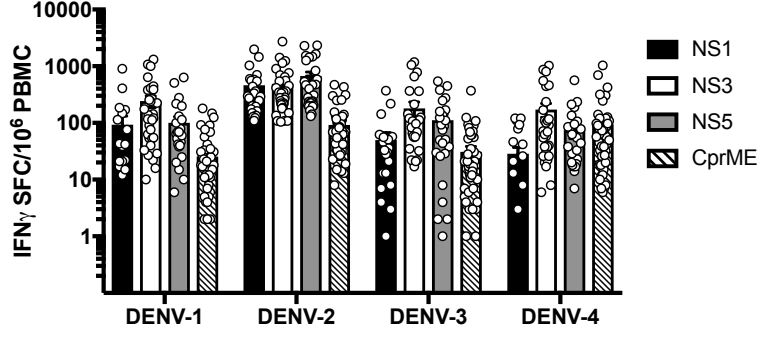

**Supplementary Figure 1:** A) Gating strategy for Figure 1A and Figure 1C. B) Gating strategy for Figure 1E. C) Quantification of total DENV-2 reactive IFN-g producing T cells from TAK-003-inoculated individuals on days 0 and 120 post vaccination as determined by ELISPOT. D) Antigen-specificity and serotype cross-reactivity of DENV-reactive, IFN- $\gamma$  production T cells on day 120 post-vaccination as determined by ELISPOT. N = 55, \*\*\* p<0.0001 (Paired 2 tailed t-test). Source data are provided as a Source Data file

# Supplementary Figure 2

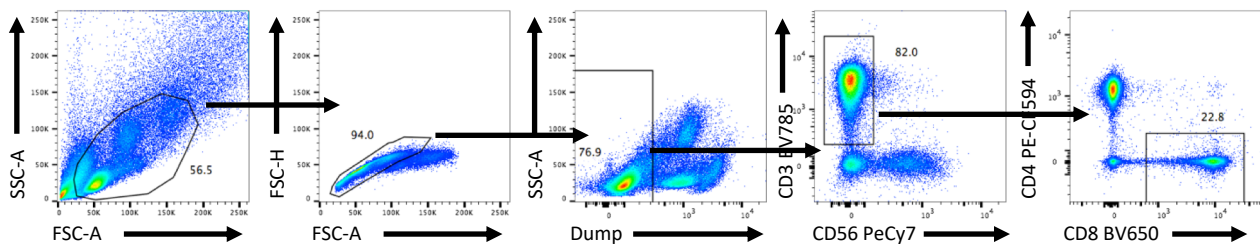

**Supplementary Figure 2: Gating strategy for Figure 2B and Figure 2C.** Dump channel contains viability marker (Aqua Live/Dead), CD14 BV510, and CD19 BV510.

# Supplementary Figure 3

Sorted CD8<sup>+</sup> CD69<sup>+</sup> CD25<sup>+</sup> T cells  
**Day 120 post vaccination**  
 18 hours peptide stimulation

NS1-reactive

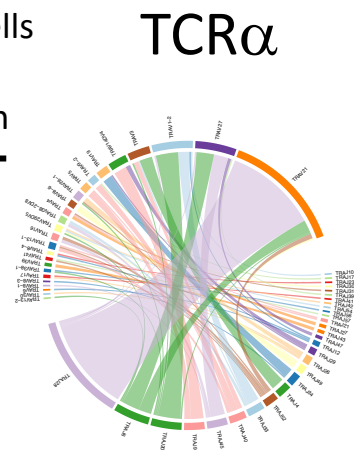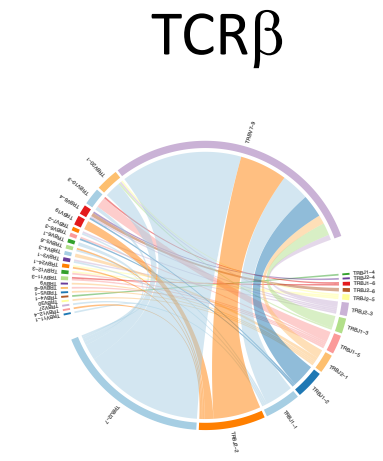

NS3-reactive

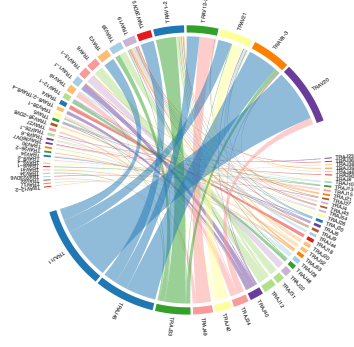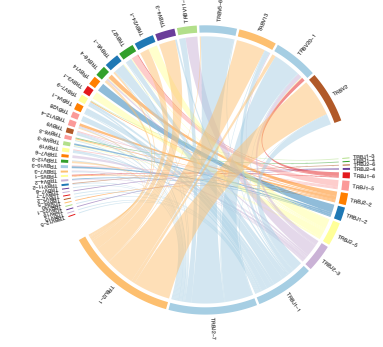

Sorted CD8<sup>+</sup> T cells  
**Day 14 post vaccination**  
 No ex vivo stimulation

CD38<sup>-</sup> HLA-DR<sup>-</sup>

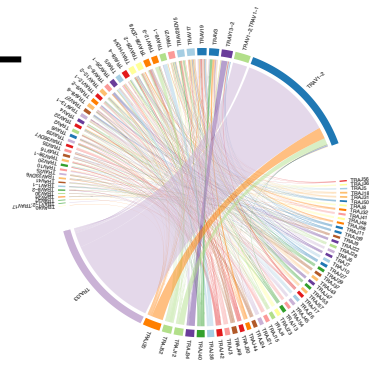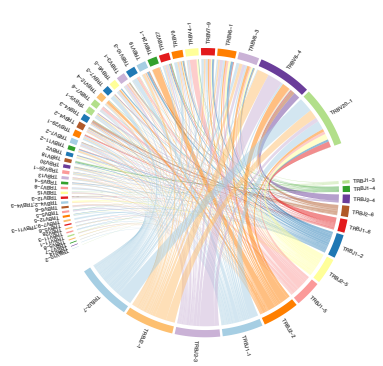

CD38<sup>+</sup> HLA-DR<sup>+</sup>

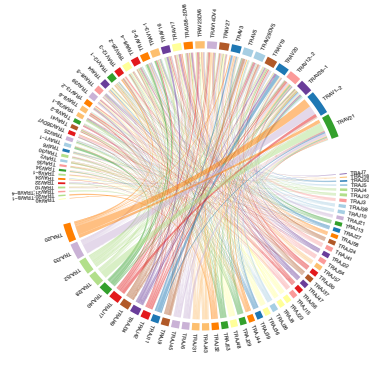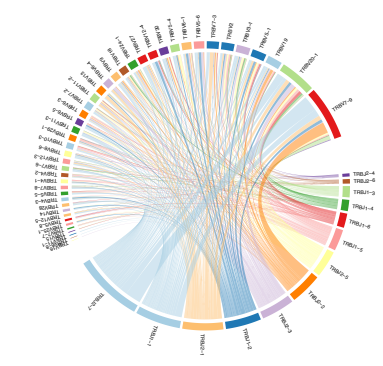

**Supplementary Figure 3: A)** TCRα and TCRβ V/J segment usage and pairing from sorted CD25<sup>+</sup>CD69<sup>+</sup> CD8<sup>+</sup> T cells isolated following *in vitro* stimulation with NS1- and NS3-derived peptide pools 120 days post TAK-003 administration. **B)** TCRα and TCRβ V/J segment usage and pairing from sorted CD38<sup>-</sup>HLA-DR<sup>-</sup> (resting) CD8<sup>+</sup> T cells and CD38<sup>+</sup>HLA-DR<sup>+</sup> (activated) CD8<sup>+</sup> T cells 14 days post TAK-003 administration



# Supplementary Figure 4

A.

Merged CD38<sup>+</sup>HLA-DR<sup>+</sup>/CD38<sup>-</sup>HLA-DR<sup>-</sup> CD8<sup>+</sup> T cells  
Day 14 post TAK-003 administration

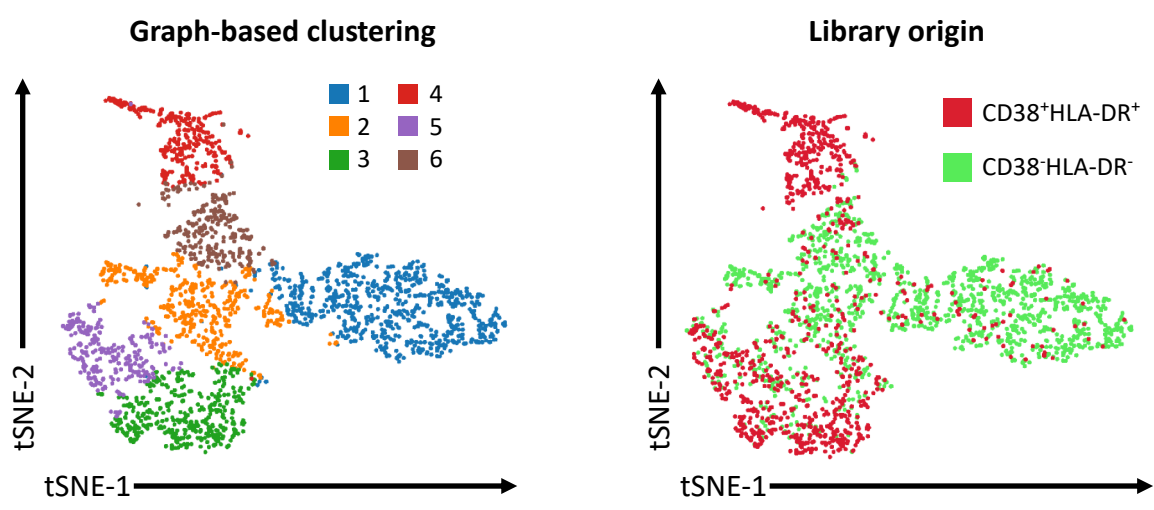

B.

Cluster-based population overlap

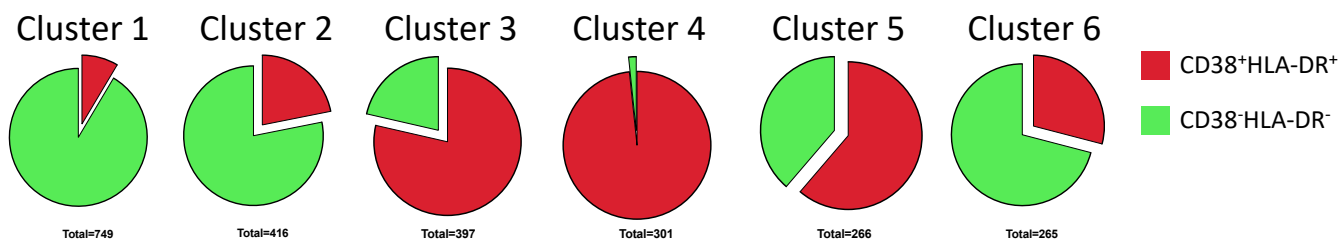

C.

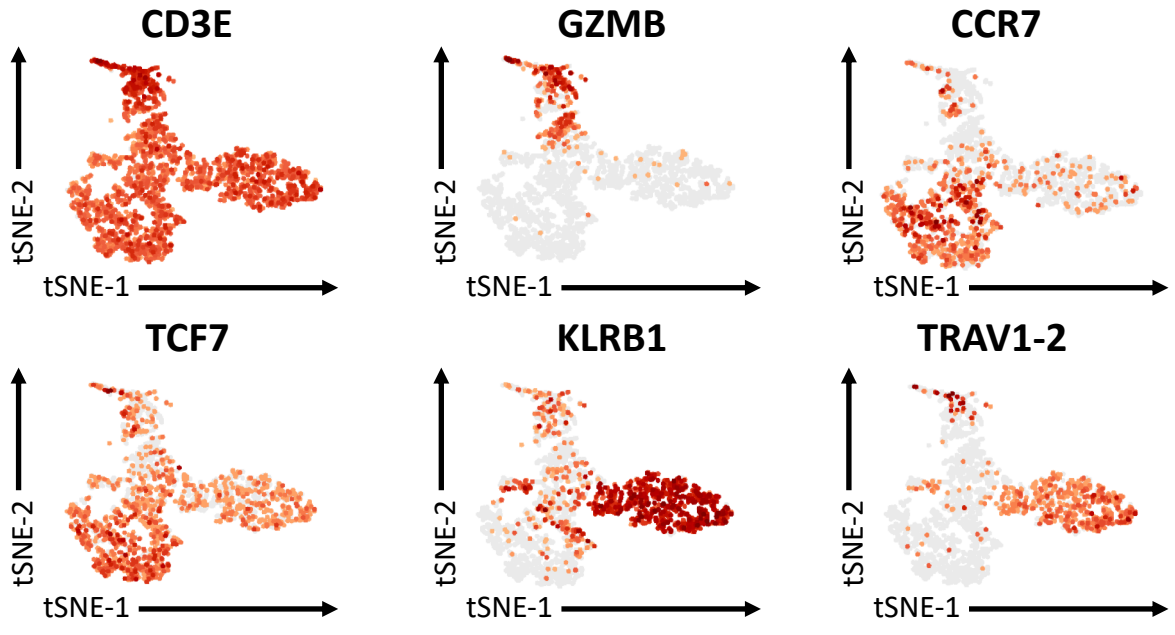

Supplementary Figure 4. scRNAseq analysis of sorted CD38<sup>+</sup>HLA-DR<sup>+</sup>CD8<sup>+</sup> T cells and sorted CD38<sup>-</sup>HLA-DR<sup>-</sup>CD8<sup>+</sup> T cells 14 days post TAK-003 administration. Gene expression datasets merged for downstream analysis

# Supplementary Figure 5

Memory-precursor  
transcriptional location

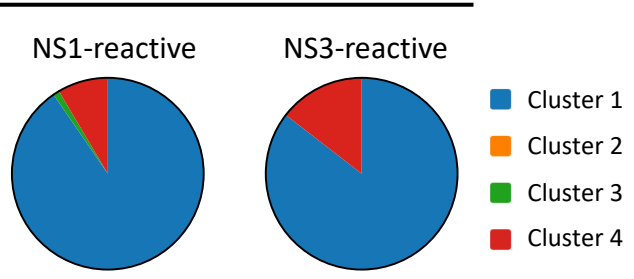

**Supplementary Figure 5.** Transcriptional cluster localization of NS1- and NS3- reactive CD8<sup>+</sup> memory precursors at day 14 post-TAK-003 administration

# Supplementary Figure 6

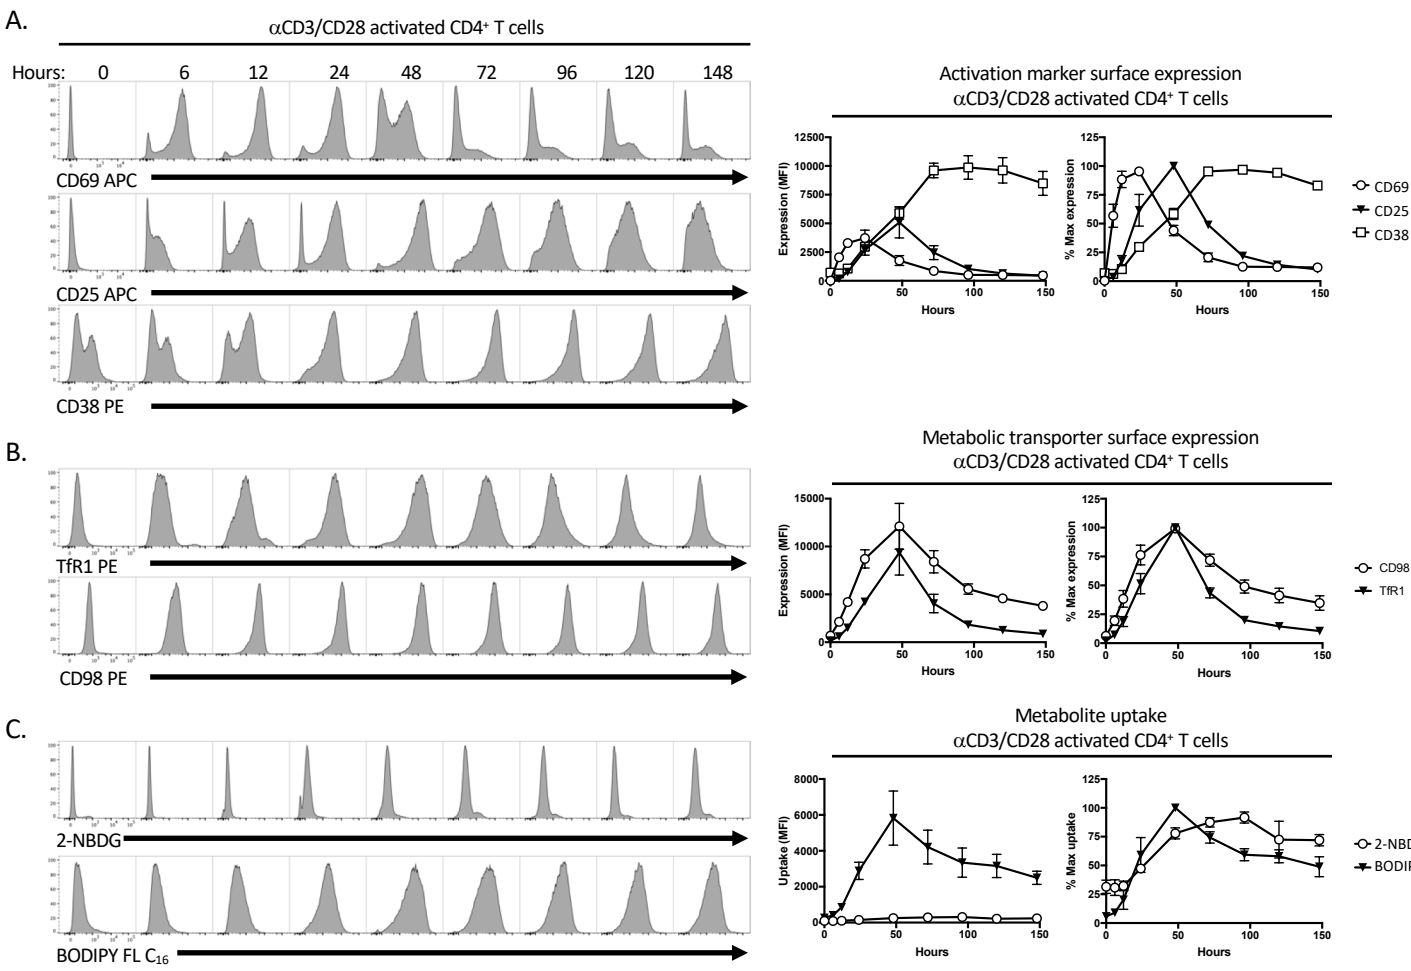

**Supplementary Figure 6:** Metabolic marker upregulation on *in vitro* stimulated CD4 T cells. PBMCs from healthy donors were stimulated with 0.1mg/ml  $\alpha$ CD3 and 1mg/ml  $\alpha$ CD28 and expression of **A)** CD69 and CD25 **B)** TfR1 and CD98, or **C)** uptake of 2-NBDG and BODIPY FL-C<sub>16</sub> at the indicated timepoints. Results are representative of two independent experiments, with a total of 4 individual donors. Source data are provided as a Source Data file

# Supplementary Figure 7

A.

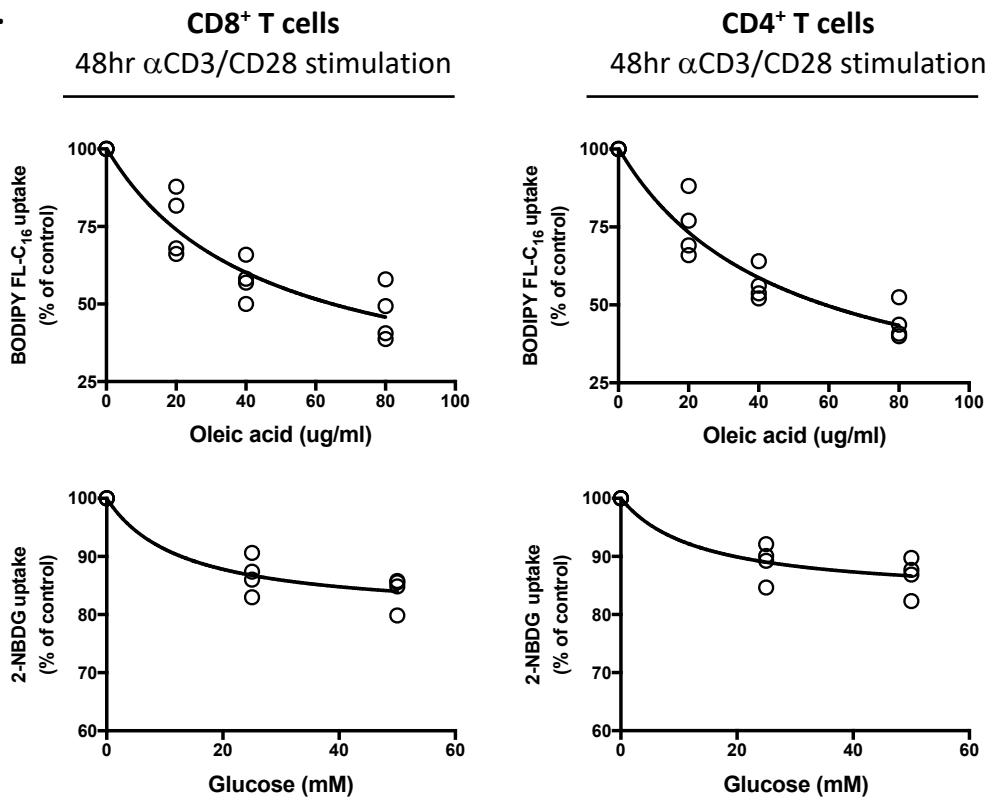

B.

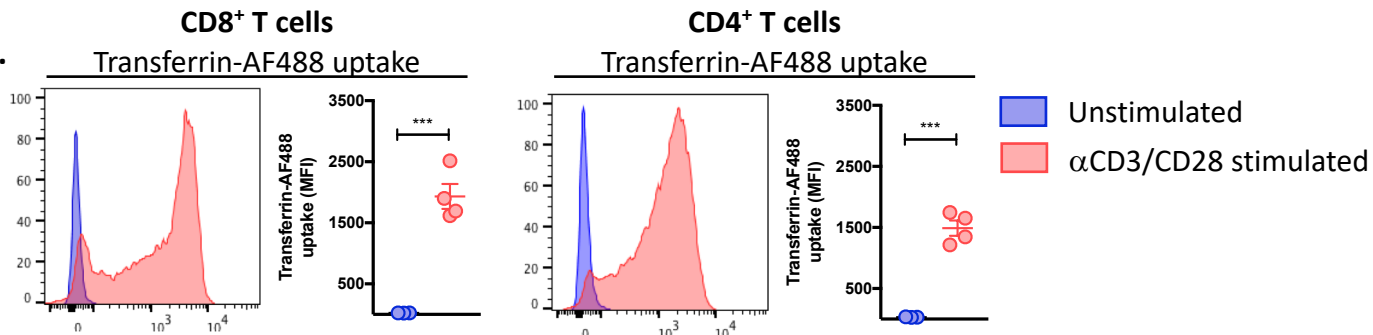

**Supplementary Figure 7: A)** Inhibition of BODIPY FL-C<sub>16</sub> and 2-NBDG uptake in activated T cells by competition with unlabeled metabolites. PBMCs were stimulated with 0.1  $\mu$ g/mL of  $\alpha$ CD3 and 1  $\mu$ g/ml  $\alpha$ CD28 for 48hrs prior to analysis. BODIPY FL-C<sub>16</sub> uptake was assessed in the presence or absence of 20-80  $\mu$ g/ml Oleic acid in complete cell culture media, while 2-NBDG uptake was assessed in the presence or absence of 25-50mM D-Glucose in glucose-free RPMI. Lines show non-linear fit analysis of inhibitor vs response (three parameters). **B)** Binding of Transferrin-AF488 by activated CD8<sup>+</sup> and CD4<sup>+</sup> T cells. PBMCs were stimulated with 0.1  $\mu$ g/mL of  $\alpha$ CD3 and 1  $\mu$ g/ml  $\alpha$ CD28 for 48hrs. Cells were washed in serum-free RPMI, then incubated for 30min with 50  $\mu$ g/mL of Transferrin-AF488, follow by surface staining. Source data are provided as a Source Data file

# Supplementary Figure 8

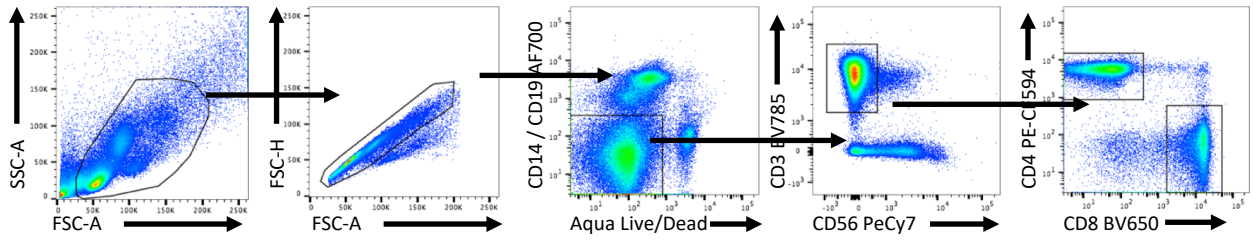

Supplementary Figure 8: Gating scheme for Figure 6 and Supplementary Figure 8

# Supplementary Figure 9

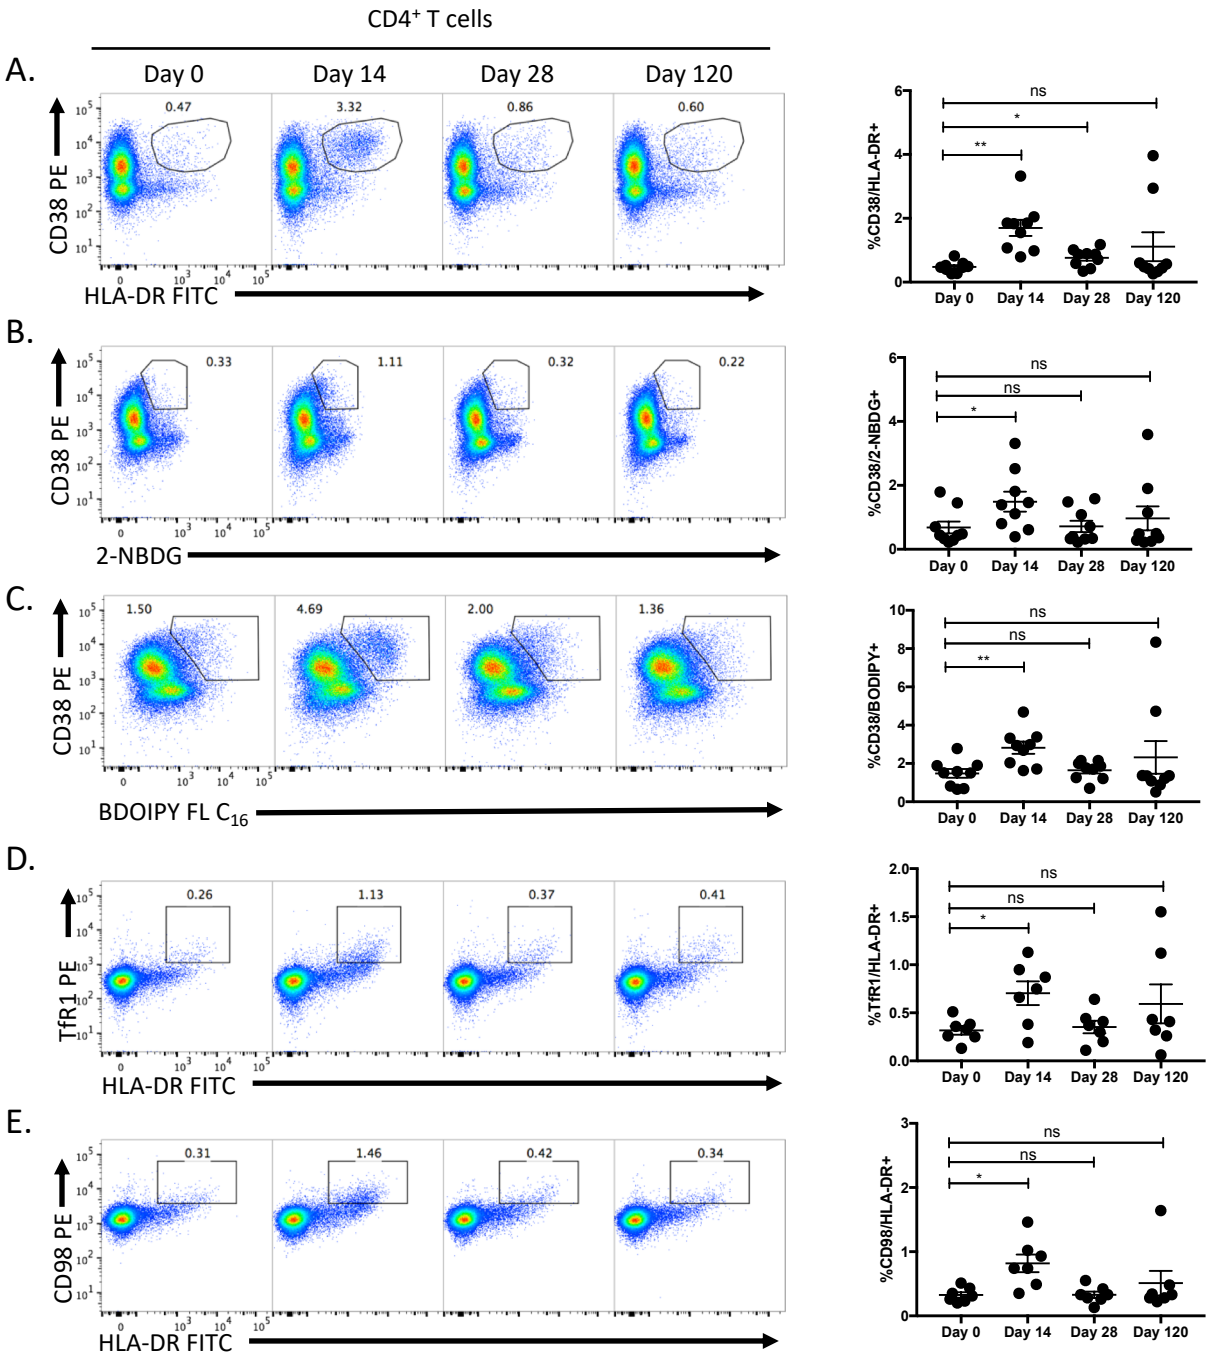

**Supplementary Figure 9: Vaccine-reactive CD4<sup>+</sup> T cells are identifiable by changes in metabolite transporter expression and metabolite utilization.** CD4 T cells from TAK-003 recipients were analyzed by flow cytometry at days 0, 14, 28 and 120 post vaccination. Vaccine-reactive CD4<sup>+</sup> T cells were quantified based on expression of **A)** CD38/HLA-DR, **B)** CD38/2-NBDG, **C)** CD38/BODIPY FL-C16, **D)** Tfr1/HLA-DR, or **E)** CD98/HLA-DR. Error bars show mean and SEM. N = 10 individuals. \* p < 0.05, \*\* p < 0.01 (paired t test). Source data are provided as a Source Data file

# Supplementary Figure 10

A.

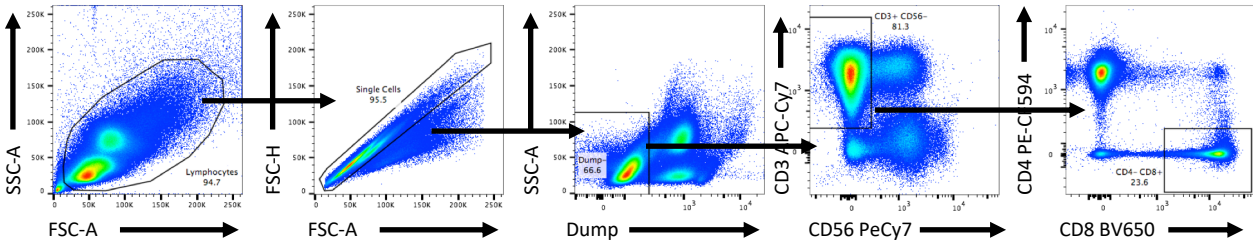

**Supplementary Figure 10: Gating strategy for Figure 7.** Dump channel contains viability marker (Aqua Live/Dead), CD14 BV510, and CD19 BV510.



# Supplementary Figure 11

Vaccine-reactive CD8<sup>+</sup> T cells  
Day 14 post vaccination

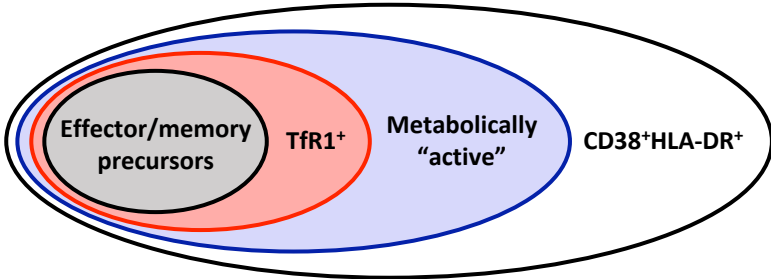

Supplementary Figure 11: Graphical representation of proposed memory precursor model

**Supplementary Table 1.** Immunodominant epitopes identified by matrix ELISPOT analysis of PBMCs from the individual analyzed in figure 2A

| <b>Peptide ID</b> | <b>Length</b> | <b>Sequence</b>    | <b>Genomic Location<br/>(amino acid #)</b> |
|-------------------|---------------|--------------------|--------------------------------------------|
| NS1-10            | 18            | KQITPELNHILSENEVKL | 844 - 861                                  |
| NS1-20            | 16            | TAECPNTNRAWNSLEV   | 915 - 930                                  |
| NS3-30            | 16            | LRTLILAPTRVVAEM    | 1,691 - 1,706                              |
| NS3-75            | 16            | EGINYADRRWCDFGIK   | 2,028 – 2,043                              |

**Supplementary Table 2.** Differential gene expression from scRNAseq analysis of merged CD38<sup>+</sup>HLA-DR<sup>+</sup>CD8<sup>+</sup> T cells and CD38<sup>+</sup>HLA-DR<sup>+</sup>CD8<sup>+</sup> T cells isolated 14 days post TAK-003 administration

| Cluster 1       |           |          |         | Cluster 2       |              |             |         | Cluster 3       |           |             |         |
|-----------------|-----------|----------|---------|-----------------|--------------|-------------|---------|-----------------|-----------|-------------|---------|
| Ensembl ID      | Gene Name | p-Value  | Log2 FC | Ensembl ID      | Gene Name    | p-Value     | Log2 FC | Ensembl ID      | Gene Name | p-Value     | Log2 FC |
| ENSG00000204475 | NCR3      | 1.14E-30 | 3.10    | ENSG00000160789 | LMNA         | 0.0288592   | 1.20    | ENSG00000172005 | MAL       | 1.90E-19    | 2.91    |
| ENSG00000221869 | CEBPD     | 1.87E-25 | 2.93    | ENSG00000102760 | RGCC         | 0.1811397*  | 0.98    | ENSG00000138795 | LEF1      | 7.83E-11    | 2.15    |
| ENSG00000256553 | TRAV1-2   | 4.43E-24 | 2.77    | ENSG00000126353 | CCR7         | 0.2861576*  | 0.97    | ENSG00000179144 | GIMAP7    | 4.15E-08    | 1.82    |
| ENSG00000165272 | AQP3      | 3.71E-21 | 2.50    | ENSG00000109321 | AREG         | 0.2958368*  | 0.99    | ENSG00000265972 | TXNIP     | 2.18E-06    | 1.60    |
| ENSG00000139187 | KLRG1     | 2.53E-18 | 2.30    | ENSG00000092820 | EZR          | 0.4035891*  | 0.83    | ENSG00000188404 | SELL      | 6.36E-06    | 1.57    |
| ENSG00000111796 | KLRB1     | 6.44E-14 | 3.66    | ENSG00000130844 | ZNF331       | 0.6379040*  | 0.75    | ENSG00000081059 | TCF7      | 8.65E-06    | 1.53    |
| ENSG00000140030 | GPR65     | 1.39E-10 | 1.73    | ENSG00000153234 | NR4A2        | 0.8413076*  | 0.68    | ENSG00000100100 | PIK3IP1   | 1.41E-05    | 1.49    |
| ENSG00000132965 | ALOX5AP   | 8.51E-10 | 1.66    | ENSG00000171223 | JUNB         | 0.9054231*  | 0.65    | ENSG00000131507 | NDFIP1    | 7.73E-05    | 1.38    |
| ENSG00000100219 | XBP1      | 3.37E-09 | 1.60    | ENSG00000198695 | MT-ND6       | 0.92369497* | 0.66    | ENSG00000114861 | FOXP1     | 7.80E-05    | 1.41    |
| ENSG00000107742 | SPOCK2    | 2.98E-07 | 1.38    | ENSG00000177606 | JUN          | 1*          | 0.63    | ENSG00000126353 | CCR7      | 0.0001194   | 1.44    |
| ENSG00000069667 | RORA      | 1.12E-06 | 1.35    | ENSG00000143384 | MCL1         | 1*          | 0.49    | ENSG00000099204 | ABLIM1    | 0.0008992   | 1.25    |
| ENSG00000120129 | DUSP1     | 1.61E-06 | 1.30    | ENSG00000177954 | RPS27        | 1*          | 0.28    | ENSG00000132424 | PNISR     | 0.0027191   | 1.14    |
| ENSG00000113088 | GZMK      | 5.47E-06 | 1.30    | ENSG00000142676 | RPL11        | 1*          | 0.16    | ENSG00000082074 | FYB       | 0.0140815   | 1.02    |
| ENSG00000168685 | IL7R      | 6.32E-06 | 1.24    | ENSG00000197747 | S100A10      | 1*          | 0.15    | ENSG00000152558 | TMEM123   | 0.0176622   | 0.98    |
| ENSG00000211747 | TRBV20-1  | 6.53E-06 | 1.47    | ENSG00000122406 | RPL5         | 1*          | 0.1     | ENSG00000127528 | KLF2      | 0.1300802*  | 0.75    |
| ENSG00000180644 | PRF1      | 6.53E-06 | 1.31    | ENSG00000142937 | RFP55        | 1*          | 0.09    | ENSG00000111678 | C12orf57  | 0.1425691*  | 0.71    |
| ENSG00000134107 | BHLHE40   | 7.96E-06 | 1.28    | ENSG00000168653 | NDU5F8       | 1*          | 0.08    | ENSG00000111716 | LDHB      | 0.1636998*  | 0.74    |
| ENSG00000170345 | FOS       | 2.32E-05 | 1.18    | ENSG00000116251 | RPL22        | 1*          | 0.06    | ENSG00000171522 | PTGER4    | 0.1725445*  | 0.70    |
| ENSG00000151883 | PARP8     | 3.59E-05 | 1.19    | ENSG00000020633 | RUNX3        | 1*          | 0.04    | ENSG00000078596 | ITM2A     | 0.1830545*  | 0.70    |
| ENSG00000116741 | RGS2      | 4.20E-05 | 1.21    | ENSG00000183508 | FAM46C       | 1*          | 0.04    | ENSG00000133872 | SARAF     | 0.1929737*  | 0.68    |
| Cluster 4       |           |          |         | Cluster 5       |              |             |         | Cluster 6       |           |             |         |
| Ensembl ID      | Gene Name | p-Value  | Log2 FC | Ensembl ID      | Gene Name    | p-Value     | Log2 FC | Ensembl ID      | Gene Name | p-Value     | Log2 FC |
| ENSG00000176890 | TYMS      | 1.28E-45 | 7.30    | ENSG00000126353 | CCR7         | 1.47E-05    | 1.94    | ENSG00000115523 | GNLY      | 6.67E-08    | 2.45    |
| ENSG00000117632 | STMN1     | 2.07E-35 | 3.83    | ENSG00000172005 | MAL          | 7.41E-05    | 1.92    | ENSG00000137441 | FGFBP2    | 8.69E-06    | 2.27    |
| ENSG00000196126 | HLA-DRB1  | 2.79E-33 | 3.69    | ENSG00000256039 | RP11-291B2.1 | 0.00229398  | 1.69    | ENSG00000100450 | GZMH      | 3.99E-05    | 2.09    |
| ENSG00000204287 | HLA-DRA   | 5.97E-32 | 4.11    | ENSG00000138795 | LEF1         | 0.01295731  | 1.43    | ENSG00000100453 | GZMB      | 3.99E-05    | 2.22    |
| ENSG00000182054 | IDH2      | 8.24E-29 | 2.98    | ENSG00000099204 | ABLIM1       | 0.19874825* | 1.02    | ENSG00000211714 | TRBV7-3   | 0.00098458  | 2.76    |
| ENSG00000278030 | TRBV7-9   | 1.49E-23 | 3.24    | ENSG00000196352 | CD55         | 0.21238846* | 0.99    | ENSG00000275302 | CCL4      | 0.0129037   | 2.00    |
| ENSG00000222041 | LINC00152 | 2.42E-20 | 2.57    | ENSG00000131507 | NDFIP1       | 0.35696785* | 0.87    | ENSG00000276070 | CCL4L2    | 0.00193859  | 2.79    |
| ENSG00000137441 | FGFBP2    | 4.31E-20 | 2.81    | ENSG00000081059 | TCF7         | 0.39989201* | 0.87    | ENSG00000134539 | KLRD1     | 0.00660648  | 1.58    |
| ENSG00000100453 | GZMB      | 8.73E-19 | 2.83    | ENSG00000109321 | AREG         | 0.41200657* | 0.93    | ENSG00000100097 | LGALS1    | 0.01337712  | 1.64    |
| ENSG00000137309 | HMGAI1    | 1.12E-17 | 2.32    | ENSG00000130844 | ZNF331       | 0.48400284* | 0.81    | ENSG00000223865 | HLA-DPB1  | 0.04209127  | 1.36    |
| ENSG00000164104 | HMGGB2    | 2.79E-14 | 2.34    | ENSG00000111678 | C12orf57     | 0.5365518*  | 0.76    | ENSG00000231389 | HLA-DPA1  | 0.0479035   | 1.38    |
| ENSG0000019582  | CD74      | 2.79E-14 | 2.18    | ENSG00000114861 | FOXP1        | 0.66101578* | 0.73    | ENSG00000077984 | CS7       | 0.06235885* | 1.28    |
| ENSG00000196230 | TUBB      | 2.79E-14 | 2.28    | ENSG00000112245 | PTP4A1       | 0.66999936* | 0.72    | ENSG00000105374 | NKG7      | 0.06898583* | 1.28    |
| ENSG00000111640 | GAPDH     | 2.79E-14 | 2.37    | ENSG00000163682 | RPL9         | 0.77194459* | 0.67    | ENSG00000127824 | TUBA4A    | 0.21525376* | 1.11    |
| ENSG00000100450 | GZMH      | 2.79E-14 | 3.00    | ENSG00000144713 | RPL32        | 0.78633913* | 0.66    | ENSG00000197971 | MBP       | 0.38340184* | 1.02    |
| ENSG00000103187 | COTL1     | 2.79E-14 | 2.61    | ENSG00000145425 | RPS3A        | 0.78864494* | 0.66    | ENSG00000150093 | ITGB1     | 0.40835006* | 1.05    |
| ENSG00000184009 | ACTG1     | 2.79E-14 | 2.17    | ENSG00000188404 | SELL         | 0.79356275* | 0.65    | ENSG00000153563 | CD8A      | 0.48414365* | 0.95    |
| ENSG00000123416 | TUBA1B    | 2.32E-13 | 2.07    | ENSG00000114942 | EEF1B2       | 0.82617714* | 0.64    | ENSG00000197540 | GZMM      | 0.50328961* | 0.95    |
| ENSG00000198830 | HMGN2     | 3.97E-13 | 1.96    | ENSG00000100100 | PIK3IP1      | 0.82617714* | 0.62    | ENSG00000197019 | SERTAD1   | 0.54337247* | 0.95    |
| ENSG00000231389 | HLA-DPA1  | 1.51E-12 | 2.05    | ENSG00000116251 | RPL22        | 0.83002934* | 0.62    | ENSG00000172116 | CD8B      | 0.55791841* | 0.93    |

\*Not significant

| CD38 <sup>+</sup> HLA-DR <sup>+</sup> |           |          |         | CD38 <sup>+</sup> HLA-DR <sup>-</sup> |           |             |         |
|---------------------------------------|-----------|----------|---------|---------------------------------------|-----------|-------------|---------|
| Ensembl ID                            | Gene Name | p-Value  | Log2 FC | Ensembl ID                            | Gene Name | p-Value     | Log2 FC |
| ENSG00000204287                       | HLA-DRA   | 1.26E-46 | 6.58    | ENSG00000111796                       | KLRB1     | 2.45E-20    | 2.51    |
| ENSG00000196126                       | HLA-DRB1  | 3.30E-28 | 3.63    | ENSG00000165272                       | AQP3      | 6.55E-07    | 1.45    |
| ENSG00000117632                       | STMN1     | 1.64E-21 | 3.07    | ENSG00000120129                       | DUSP1     | 2.15E-06    | 1.29    |
| ENSG00000103187                       | COTL1     | 1.04E-17 | 2.25    | ENSG00000170345                       | FOS       | 9.94E-06    | 1.22    |
| ENSG00000278030                       | TRBV7-9   | 1.21E-13 | 2.49    | ENSG00000160789                       | LMNA      | 1.52E-05    | 1.29    |
| ENSG00000100450                       | GZMH      | 1.08E-10 | 1.90    | ENSG00000100906                       | NFKBIA    | 0.000167779 | 1.06    |
| ENSG00000164104                       | HMGGB2    | 1.20E-10 | 1.76    | ENSG00000168685                       | IL7R      | 0.000363501 | 1.02    |
| ENSG00000188404                       | SELL      | 9.56E-10 | 1.66    | ENSG00000159388                       | BTG2      | 0.000399979 | 1.02    |
| ENSG00000111640                       | GAPDH     | 1.76E-09 | 1.57    | ENSG00000107742                       | SPOCK2    | 0.00054224  | 1.01    |
| ENSG0000019582                        | CD74      | 3.17E-09 | 1.58    | ENSG00000099860                       | GADD45B   | 0.000577645 | 1.01    |
| ENSG00000198830                       | HMGN2     | 3.83E-09 | 1.56    | ENSG00000110848                       | CD69      | 0.000834716 | 0.98    |
| ENSG00000196230                       | TUBB      | 5.63E-09 | 1.63    | ENSG00000172543                       | CTSWS     | 0.001700994 | 0.93    |
| ENSG00000137441                       | FGFBP2    | 2.81E-08 | 1.77    | ENSG00000144655                       | CSRNP1    | 0.001724074 | 0.94    |
| ENSG00000184009                       | ACTG1     | 4.86E-08 | 1.44    | ENSG00000168209                       | DDIT4     | 0.002324266 | 0.92    |
| ENSG00000148908                       | RGS10     | 2.53E-07 | 1.38    | ENSG00000152518                       | ZFP36L2   | 0.002738483 | 0.88    |
| ENSG00000123416                       | TUBA1B    | 2.75E-06 | 1.34    | ENSG00000198695                       | MT-ND6    | 0.003401321 | 0.93    |
| ENSG00000082074                       | FYB       | 1.24E-05 | 1.20    | ENSG00000160888                       | IER2      | 0.004893276 | 0.85    |
| ENSG00000172531                       | PPP1CA    | 1.34E-05 | 1.20    | ENSG00000125740                       | FOSB      | 0.005352012 | 0.86    |
| ENSG00000139193                       | CD27      | 2.88E-05 | 1.18    | ENSG00000145675                       | PIK3R1    | 0.007252764 | 0.85    |
| ENSG00000090104                       | RGS1      | 2.95E-05 | 1.25    | ENSG00000044574                       | HSPA5     | 0.007972284 | 0.83    |

**Supplementary Table 3.** Dominant TCR clones from Tfr1<sup>+</sup>HLA-DR<sup>+</sup> CD8<sup>+</sup> T cells isolated 14 days post TAK-003 administration

| Tfr1 <sup>+</sup> HLA-DR <sup>+</sup> CD8 <sup>+</sup> T cell clones, day 14 post TAK-003 administration |                 |          |        |                  |         |       |         |
|----------------------------------------------------------------------------------------------------------|-----------------|----------|--------|------------------|---------|-------|---------|
| Frequency                                                                                                | TCR $\alpha$    |          |        | TCR $\beta$      |         |       |         |
|                                                                                                          | CDR3aa          | V        | J      | CDR3aa           | V       | D     | J       |
| 0.1                                                                                                      | CAPLGGAGSYQLTF  | TRAV21   | TRAJ28 | CASSPRQGNTGELFF  | TRBV7-9 | TRBD1 | TRBJ2-2 |
| 0.075                                                                                                    | CAGRGAGSYQLTF   | TRAV21   | TRAJ28 | CASSLLSYEQYF     | TRBV7-9 |       | TRBJ2-7 |
| 0.0625                                                                                                   | CAVRFPRDYKLSF   | TRAV21   | TRAJ20 | CASSPTGTGYEQYF   | TRBV7-9 | TRBD1 | TRBJ2-7 |
| 0.05                                                                                                     | CAVRGRGDYKLSF   | TRAV1-2  | TRAJ20 | CASSSAGTLNTGELFF | TRBV7-9 | TRBD1 | TRBJ2-2 |
| 0.0375                                                                                                   | CAGAWKNTGFQKLVF | TRAV27   | TRAJ8  | CASSEWEGNYGYTF   | TRBV6-1 | TRBD2 | TRBJ1-2 |
| 0.0375                                                                                                   | CALSEAQYNFNKFYF | TRAV19   | TRAJ21 | CASSIPTSGLGDTQYF | TRBV5-6 | TRBD2 | TRBJ2-3 |
| 0.0375                                                                                                   | CIVRSLINYGQNFVF | TRAV26-1 | TRAJ26 | CASSSVSYEQYF     | TRBV7-9 |       | TRBJ2-7 |
| 0.0375                                                                                                   | CAVQAGGYSTLTF   | TRAV20   | TRAJ11 | CASAEADNEQFF     | TRBV13  | TRBD2 | TRBJ2-1 |
| 0.025                                                                                                    | CAVNEAGGFKTIF   | TRAV12-2 | TRAJ9  | CASSLEVFDEQFF    | TRBV5-6 |       | TRBJ2-1 |
| 0.025                                                                                                    | CAESGDSNYQLIW   | TRAV5    | TRAJ33 | CAWSVGGTGELFF    | TRBV30  | TRBD1 | TRBJ2-2 |

**Supplementary Table 4.** Differential gene expression from scRNAseq analysis of merged CD38<sup>+</sup>HLA-DR<sup>+</sup>CD8<sup>+</sup> T cells and Tfr1<sup>+</sup>HLA-DR<sup>+</sup>CD8<sup>+</sup> T cells isolated 14 days post TAK-003 administration

| Cluster 1       |           |            |         | Cluster 2       |           |            |         | Cluster 3       |           |             |         |
|-----------------|-----------|------------|---------|-----------------|-----------|------------|---------|-----------------|-----------|-------------|---------|
| Ensembl ID      | Gene Name | p-Value    | Log2 FC | Ensembl ID      | Gene Name | p-Value    | Log2 FC | Ensembl ID      | Gene Name | p-Value     | Log2 FC |
| ENSG00000137441 | FGFBP2    | 5.03E-13   | 2.36    | ENSG00000265972 | TXNIP     | 2.47E-13   | 2.50    | ENSG00000126353 | CCR7      | 4.04E-09    | 2.20    |
| ENSG00000271503 | CCL5      | 9.87E-13   | 2.09    | ENSG00000172005 | MAL       | 1.83E-12   | 2.51    | ENSG00000172005 | MAL       | 7.64E-06    | 1.89    |
| ENSG00000105374 | NKG7      | 1.51E-08   | 1.73    | ENSG00000100100 | PIK3IP1   | 8.34E-11   | 2.16    | ENSG00000109321 | AREG      | 8.73E-06    | 2.02    |
| ENSG00000100450 | GZMH      | 1.21E-06   | 1.57    | ENSG00000081059 | TCF7      | 3.51E-08   | 1.91    | ENSG00000171223 | JUNB      | 0.01049662  | 1.15    |
| ENSG00000278030 | TRBV7-9   | 6.49E-06   | 1.65    | ENSG00000138795 | LEF1      | 2.37E-07   | 1.87    | ENSG00000130844 | ZNF331    | 0.01156852  | 1.17    |
| ENSG00000019582 | CD74      | 7.09E-06   | 1.40    | ENSG00000179144 | GIMAP7    | 1.30E-06   | 1.71    | ENSG00000081059 | TCF7      | 0.02238134  | 1.11    |
| ENSG00000077984 | CST7      | 8.18E-06   | 1.42    | ENSG00000131507 | NDFIP1    | 1.68E-05   | 1.54    | ENSG00000131507 | NDFIP1    | 0.02289179  | 1.08    |
| ENSG00000245532 | NEAT1     | 1.31E-05   | 1.37    | ENSG00000169508 | GPR183    | 4.69E-05   | 1.58    | ENSG00000099204 | ABLIM1    | 0.02584505  | 1.09    |
| ENSG00000175567 | UCP2      | 2.50E-05   | 1.31    | ENSG00000114861 | FOXP1     | 8.54E-05   | 1.47    | ENSG00000227507 | LTB       | 0.03052904  | 1.07    |
| ENSG00000179344 | HLA-DQB1  | 8.01E-05   | 1.37    | ENSG00000251562 | MALAT1    | 0.00054176 | 1.27    | ENSG00000112245 | PTP4A1    | 0.03529138  | 1.06    |
| ENSG00000159111 | MRPL10    | 0.00012172 | 1.25    | ENSG00000127528 | KLF2      | 0.00069426 | 1.28    | ENSG00000196352 | CD55      | 0.03590761  | 1.05    |
| ENSG00000222041 | LINC00152 | 0.00015146 | 1.27    | ENSG00000132424 | PNISR     | 0.00096991 | 1.26    | ENSG00000100100 | PIK3IP1   | 0.04157423  | 1.03    |
| ENSG00000139193 | CD27      | 0.00019436 | 1.21    | ENSG00000152558 | TMEM123   | 0.00105688 | 1.26    | ENSG00000138795 | LEF1      | 0.04160725* | 1.07    |
| ENSG00000223865 | HLA-DPB1  | 0.00030964 | 1.24    | ENSG00000227507 | LTB       | 0.00119214 | 1.26    | ENSG00000163682 | RPL9      | 0.05916098* | 0.94    |
| ENSG00000204287 | HLA-DRA   | 0.00033473 | 1.31    | ENSG00000108848 | LUC7L3    | 0.00262805 | 1.21    | ENSG00000167552 | TUBA1A    | 0.06067694* | 0.96    |
| ENSG00000275302 | CCL4      | 0.00044781 | 1.61    | ENSG00000245164 | LINC00861 | 0.00366311 | 1.22    | ENSG00000241343 | RPL36A    | 0.07101436* | 0.90    |
| ENSG00000134107 | BHLHE40   | 0.00047933 | 1.21    | ENSG00000108654 | DDX5      | 0.00647541 | 1.08    | ENSG00000171522 | PTGER4    | 0.0749041*  | 0.94    |
| ENSG00000172116 | CD8B      | 0.00054519 | 1.17    | ENSG00000126353 | CCR7      | 0.00903681 | 1.14    | ENSG00000059804 | SLC2A3    | 0.08478618* | 0.90    |
| ENSG00000133321 | RARRES3   | 0.00089478 | 1.09    | ENSG00000099204 | ABLIM1    | 0.0104046  | 1.08    | ENSG00000105373 | GLTSCR2   | 0.08478618* | 0.88    |
| ENSG00000150093 | ITGB1     | 0.00135707 | 1.15    | ENSG00000105373 | GLTSCR2   | 0.02220148 | 0.94    | ENSG00000111678 | C12orf57  | 0.08547346* | 0.88    |

| Cluster 4       |           |            |         | Cluster 5       |           |          |         |
|-----------------|-----------|------------|---------|-----------------|-----------|----------|---------|
| Ensembl ID      | Gene Name | p-Value    | Log2 FC | Ensembl ID      | Gene Name | p-Value  | Log2 FC |
| ENSG00000111796 | KLRB1     | 3.78E-25   | 4.05    | ENSG00000176890 | TYMS      | 1.41E-59 | 6.73    |
| ENSG00000160789 | LMNA      | 3.09E-13   | 3.00    | ENSG00000171848 | RRM2      | 2.37E-47 | 6.00    |
| ENSG00000124762 | CDKN1A    | 2.30E-10   | 2.93    | ENSG00000117632 | STMN1     | 4.15E-45 | 4.45    |
| ENSG00000165272 | AQP3      | 4.54E-07   | 2.15    | ENSG00000123416 | TUBA1B    | 6.73E-42 | 4.10    |
| ENSG00000107742 | SPOCK2    | 0.00051623 | 1.46    | ENSG00000148773 | MKI67     | 3.30E-34 | 4.42    |
| ENSG00000120129 | DUSP1     | 0.00051797 | 1.45    | ENSG00000132646 | PCNA      | 1.48E-31 | 3.84    |
| ENSG00000177606 | JUN       | 0.00176111 | 1.39    | ENSG00000166508 | MCM7      | 1.67E-31 | 3.63    |
| ENSG00000168685 | IL7R      | 0.00176111 | 1.34    | ENSG00000196230 | TUBB      | 7.03E-31 | 3.36    |
| ENSG00000160888 | IER2      | 0.00230922 | 1.31    | ENSG00000164104 | HMG2      | 8.10E-28 | 3.04    |
| ENSG00000144655 | CSRNP1    | 0.00341644 | 1.33    | ENSG00000128951 | DUT       | 2.61E-27 | 3.02    |
| ENSG00000198355 | PIM3      | 0.00630064 | 1.32    | ENSG00000164611 | PTTG1     | 5.65E-25 | 3.31    |
| ENSG00000100906 | NFKBIA    | 0.00651548 | 1.23    | ENSG00000164687 | FABP5     | 4.73E-23 | 2.92    |
| ENSG00000092820 | ERZ       | 0.00959321 | 1.20    | ENSG00000113810 | SMC4      | 6.37E-23 | 2.98    |
| ENSG00000152518 | ZFP36L2   | 0.01271475 | 1.16    | ENSG00000099901 | RANBP1    | 1.97E-19 | 2.49    |
| ENSG00000128016 | ZFP36     | 0.01453321 | 1.18    | ENSG00000106399 | RPA3      | 8.68E-19 | 2.45    |
| ENSG00000168209 | DDIT4     | 0.01509927 | 1.19    | ENSG00000143401 | ANP32E    | 1.76E-17 | 2.44    |
| ENSG00000157514 | TSC22D3   | 0.01538907 | 1.14    | ENSG00000162607 | USP1      | 1.01E-15 | 2.28    |
| ENSG00000170345 | FOS       | 0.02686229 | 1.12    | ENSG00000124795 | DEK       | 1.85E-15 | 2.15    |
| ENSG00000095794 | CREM      | 0.02762123 | 1.11    | ENSG00000189159 | HN1       | 9.30E-15 | 2.17    |
| ENSG00000008704 | PPP1R15A  | 0.03000893 | 1.07    | ENSG00000111669 | TPI1      | 1.24E-14 | 2.08    |

\*Not significant

| CD38 <sup>+</sup> HLA-DR <sup>+</sup> |            |            |         | Tfr1 <sup>+</sup> HLA-DR <sup>+</sup> |           |             |         |
|---------------------------------------|------------|------------|---------|---------------------------------------|-----------|-------------|---------|
| Ensembl ID                            | Gene Name  | p-Value    | Log2 FC | Ensembl ID                            | Gene Name | p-Value     | Log2 FC |
| ENSG00000265972                       | TXNIP      | 6.90E-08   | 2.84    | ENSG00000164611                       | PTTG1     | 4.77E-09    | 2.30    |
| ENSG00000111796                       | KLRB1      | 4.94E-06   | 3.37    | ENSG00000164687                       | FABP5     | 2.85E-08    | 2.06    |
| ENSG00000171223                       | JUNB       | 1.89E-05   | 2.10    | ENSG00000117632                       | STMN1     | 4.94E-07    | 1.99    |
| ENSG00000251562                       | MALAT1     | 7.96E-05   | 1.92    | ENSG00000123416                       | TUBA1B    | 5.99E-07    | 1.94    |
| ENSG00000227507                       | LTB        | 0.00033723 | 1.87    | ENSG00000164032                       | H2AFZ     | 1.04E-05    | 1.60    |
| ENSG00000168685                       | IL7R       | 0.00136381 | 1.71    | ENSG00000196230                       | TUBB      | 1.37E-05    | 1.70    |
| ENSG00000131507                       | NDFIP1     | 0.00269915 | 1.65    | ENSG00000111639                       | MRPL51    | 3.33E-05    | 1.55    |
| ENSG00000157514                       | TSC22D3    | 0.00296655 | 1.53    | ENSG00000189159                       | HN1       | 4.24E-05    | 1.55    |
| ENSG00000127528                       | KLF2       | 0.00504828 | 1.49    | ENSG00000099901                       | RANBP1    | 6.81E-05    | 1.51    |
| ENSG00000152518                       | ZFP36L2    | 0.00784242 | 1.41    | ENSG00000111669                       | TPI1      | 7.06E-05    | 1.46    |
| ENSG00000105373                       | GLTSCR2    | 0.00856073 | 1.40    | ENSG00000100911                       | PSME2     | 8.02E-05    | 1.45    |
| ENSG00000130844                       | ZNF331     | 0.01138161 | 1.47    | ENSG00000178741                       | COX5A     | 8.69E-05    | 1.44    |
| ENSG00000059804                       | SLC2A3     | 0.01329687 | 1.39    | ENSG00000106399                       | RPA3      | 9.51E-05    | 1.49    |
| ENSG00000177954                       | RPS27      | 0.01561848 | 1.27    | ENSG00000171848                       | RRM2      | 0.000184583 | 1.87    |
| ENSG00000168209                       | DDIT4      | 0.01611611 | 1.42    | ENSG00000144381                       | HSPD1     | 0.000186542 | 1.42    |
| ENSG00000146278                       | PNRC1      | 0.01778325 | 1.28    | ENSG00000165672                       | PRDX3     | 0.000186865 | 1.46    |
| ENSG00000133639                       | BTG1       | 0.01954174 | 1.26    | ENSG00000126067                       | PSMB2     | 0.000192532 | 1.43    |
| ENSG00000167552                       | TUBA1A     | 0.02537147 | 1.30    | ENSG00000100097                       | LGALS1    | 0.000192532 | 1.68    |
| ENSG00000279483                       | AC090498.1 | 0.03944363 | 1.15    | ENSG00000100567                       | PSMA3     | 0.000276036 | 1.41    |
| ENSG00000213741                       | RPS29      | 0.04830312 | 1.11    | ENSG00000164104                       | HMG2      | 0.000305903 | 1.43    |

**Supplementary table 5. Peptide pools utilized in this study**

| DENV type    | Strain               | Protein region | Size (#aa) | Overlap (#aa) | Source                   | Cat No.             |
|--------------|----------------------|----------------|------------|---------------|--------------------------|---------------------|
| DENV-1       | Nauru/West Pac/1974  | C/prM          | 16         | 11            | JPT Peptide Technologies | custom              |
|              | Nauru/West Pac/1974  | E              | 13-18      | 11-12         | BEI Resources            | NR-9241/<br>NR-4551 |
|              | Singapore/S275/1990  | NS1            | 13-17      | 11-12         | BEI Resources            | NR-2751             |
|              | Singapore/S275/1990  | NS3            | 14-17      | 11-12         | BEI Resources            | NR-2752             |
|              | Singapore/S275/1990  | NS5            | 12-17      | 11-12         | BEI Resources            | NR-4203             |
| DENV-2       | S16803               | C/prM          | 16         | 11            | JPT Peptide Technologies | custom              |
|              | New Guinea C         | E              | 15-20      | 10-11         | BEI Resources            | NR-507              |
|              | New Guinea C         | NS1            | 15-19      | 10-11         | BEI Resources            | NR-508              |
|              | New Guinea C         | NS2a           | 15-17      | 11            | BEI Resources            | NR-2747             |
|              | New Guinea C         | NS2b           | 13-17      | 11-14         | BEI Resources            | NR-2748             |
|              | New Guinea C         | NS3            | 13-19      | 10            | BEI Resources            | NR-509              |
|              | New Guinea C         | NS4a           | 14-17      | 11-12         | BEI Resources            | NR-2749             |
|              | New Guinea C         | NS4b           | 12-17      | 11            | BEI Resources            | NR-2750             |
| New Guinea C | NS5                  | 15-17          | 11-13      | BEI Resources | NR-2746                  |                     |
| DENV-3       | CH53489              | C/prM          | 16         | 11            | JPT Peptide Technologies | custom              |
|              | Philippines/H87/1956 | E              | 12-20      | 10-11         | BEI Resources            | NR-9228/<br>NR-511  |
|              | Philippines/H87/1956 | NS1            | 13-17      | 11-12         | BEI Resources            | NR-2753             |
|              | Philippines/H87/1956 | NS3            | 14-17      | 11-12         | BEI Resources            | NR-2754             |
|              | Philippines/H87/1956 | NS5            | 13-17      | 11-13         | BEI Resources            | NR-4204             |
| DENV-4       | Singapore/8976/1995  | C/prM          | 16         | 11            | JPT Peptide Technologies | custom              |
|              | Singapore/8976/1995  | E              | 12-20      | 10-11         | BEI Resources            | NR-9229/<br>NR-512  |
|              | Singapore/8976/1995  | NS1            | 13-17      | 11-12         | BEI Resources            | NR-2755             |
|              | Singapore/8976/1995  | NS3            | 15-17      | 11-12         | BEI Resources            | NR-2756             |
|              | Singapore/8976/1995  | NS5            | 13-17      | 11-14         | BEI Resources            | NR-4205             |

**Supplementary Table 6.** Antibodies utilized for flow cytometry analysis in this study

| <b>Antibody</b>     | <b>Manufacture</b> | <b>Clone</b> | <b>Cat#</b> | <b>Lot#</b> | <b>Dilution used</b> |
|---------------------|--------------------|--------------|-------------|-------------|----------------------|
| CD14 AF700          | BD                 | M5E2         | 557923      | 7047605     | 1:160                |
| CD14 BV510          | BD                 | MOP9         | 563079      | 7129954     | 1:160                |
| CD19 AF700          | BD                 | HIB19        | 557921      | 7045883     | 1:160                |
| CD19 BV510          | BD                 | SJ25C1       | 562947      | 6287551     | 1:160                |
| CD56 PE-Cy7         | BD                 | B159         | 557747      | 7319530     | 1:40                 |
| CD98 PE             | BD                 | UM7F8        | 556077      | 7299909     | 1:40                 |
| CD107a FITC         | BD                 | H4A3         | 555800      | 4042975     | 1:200                |
| Granzyme B AF700    | BD                 | GB11         | 560213      | 7339825     | 1:20                 |
| HLA-DR FITC         | BD                 | G46-6        | 555811      | 4342790     | 1:40                 |
| IFN- $\gamma$ AF647 | BD                 | 4S.B3        | 563495      | 3221692     | 1:20                 |
| Ki67 AF488          | BD                 | B56          | 562900      | 6261744     | 1:20                 |
| CD3 BV785           | Biolegend          | OKT3         | 317330      | B231963     | 1:160                |
| CD38 BV421          | Biolegend          | HIT2         | 303526      | B240476     | 1:20                 |
| CD38 PE             | Biolegend          | HB-7         | 356604      | B189351     | 1:40                 |
| CD4 PE-Dzz594       | Biolegend          | RPA-T4       | 300548      | B200505     | 1:160                |
| CD4 BV605           | Biolegend          | RPA-T4       | 300556      | B189700     | 1:160                |
| CD69 APC            | Biolegend          | FN50         | 310910      | B176306     | 1:20                 |
| CD69 APC-Cy7        | Biolegend          | FN50         | 310914      | B195699     | 1:20                 |
| CD71 PE             | Biolegend          | CY1G4        | 334106      | B242701     | 1:40                 |
| CD8 BV650           | Biolegend          | RPA-T8       | 301042      | B239273     | 1:320                |
| HLA-DR BV605        | Biolegend          | L243         | 307640      | B218290     | 1:80                 |
| CD25 APC            | Invitrogen         | BC96         | 17-0259-42  | 4300267     | 1:20                 |
| EOMES eF660         | Invitrogen         | WD192B       | 50-4877-42  | 1988006     | 1:20                 |
