# Supplementary material for: Dissecting the heterogeneity of DENV vaccine-elicited cellular immunity using single-cell RNA sequencing and metabolic profiling
Source: PubMed Central journal article supplement (PMC6694189; doi:10.1038/s41467-019-11634-7), 2019-08-14
Supplement: 41467_2019_11634_MOESM3_ESM.pdf [file 41467_2019_11634_MOESM3_ESM.pdf]

## Reporting Summary

Nature Research wishes to improve the reproducibility of the work that we publish. This form provides structure for consistency and transparency in reporting. For further information on Nature Research policies, see [Authors & Referees](#) and the [Editorial Policy Checklist](#).

### Statistics

For all statistical analyses, confirm that the following items are present in the figure legend, table legend, main text, or Methods section.

n/a Confirmed

- The exact sample size ( $n$ ) for each experimental group/condition, given as a discrete number and unit of measurement
- A statement on whether measurements were taken from distinct samples or whether the same sample was measured repeatedly
- The statistical test(s) used AND whether they are one- or two-sided  
*Only common tests should be described solely by name; describe more complex techniques in the Methods section.*
- A description of all covariates tested
- A description of any assumptions or corrections, such as tests of normality and adjustment for multiple comparisons
- A full description of the statistical parameters including central tendency (e.g. means) or other basic estimates (e.g. regression coefficient) AND variation (e.g. standard deviation) or associated estimates of uncertainty (e.g. confidence intervals)
- For null hypothesis testing, the test statistic (e.g.  $F$ ,  $t$ ,  $r$ ) with confidence intervals, effect sizes, degrees of freedom and  $P$  value noted  
*Give  $P$  values as exact values whenever suitable.*
- For Bayesian analysis, information on the choice of priors and Markov chain Monte Carlo settings
- For hierarchical and complex designs, identification of the appropriate level for tests and full reporting of outcomes
- Estimates of effect sizes (e.g. Cohen's  $d$ , Pearson's  $r$ ), indicating how they were calculated

*Our web collection on [statistics for biologists](#) contains articles on many of the points above.*

### Software and code

Policy information about [availability of computer code](#)

Data collection

BDFACSDiva v6.2 (BD Biosciences), CTL CellCounting v1.5.5.0 (Cellular Technology Limited), CTL ImmunoSpot v7.0.15.2 (Cellular Technology Limited)

Data analysis

FlowJo v10.2 software (Treestar). Loupe Cell Browser (10x Genomics, CA, v2.0.0). Loupe VDJ Browser (10x Genomics, CA, v2.0.0). VDJTools (v1.1.8). Cell Ranger (10x Genomics, CA, v2.1.0). GraphPad Prism 6 Software (GraphPad Software, La Jolla, CA). bcl2fastq2 v2.20 (Illumina)

For manuscripts utilizing custom algorithms or software that are central to the research but not yet described in published literature, software must be made available to editors/reviewers. We strongly encourage code deposition in a community repository (e.g. GitHub). See the Nature Research [guidelines for submitting code & software](#) for further information.

### Data

Policy information about [availability of data](#)

All manuscripts must include a [data availability statement](#). This statement should provide the following information, where applicable:

- Accession codes, unique identifiers, or web links for publicly available datasets
- A list of figures that have associated raw data
- A description of any restrictions on data availability

For all data generated during the course of this project, we will follow the prevailing standards and guidelines in documenting and depositing data sets.

Quality-controlled raw data as well as processed data used in this publications will be made available upon reasonable request. As described in the manuscript, workflows will be exactly described and documented and will allow any external groups to precisely reproduce results from the raw data. Single cell RNA sequencing data will be uploaded to the NCBI Gene Expression Omnibus (GEO) repository.

We will adhere to the NIH Grants Policy on Sharing of Unique Research Resources including the Sharing of Biomedical Research Resources: Guidelines for

## Field-specific reporting

Please select the one below that is the best fit for your research. If you are not sure, read the appropriate sections before making your selection.

- Life sciences       Behavioural & social sciences       Ecological, evolutionary & environmental sciences

For a reference copy of the document with all sections, see [nature.com/documents/nr-reporting-summary-flat.pdf](https://www.nature.com/documents/nr-reporting-summary-flat.pdf)

## Life sciences study design

All studies must disclose on these points even when the disclosure is negative.

|                 |                                                                                                                                                        |
|-----------------|--------------------------------------------------------------------------------------------------------------------------------------------------------|
| Sample size     | No sample size calculations were performed for this study.                                                                                             |
| Data exclusions | No data were excluded in this analysis                                                                                                                 |
| Replication     | Other than single cell RNA sequencing experiments, all experiments were repeated at least twice with a minimum of 4 subjects to ensure reproducibility |
| Randomization   | No randomization was applied in this study                                                                                                             |
| Blinding        | Investigators were not blinded in this analysis                                                                                                        |

## Reporting for specific materials, systems and methods

We require information from authors about some types of materials, experimental systems and methods used in many studies. Here, indicate whether each material, system or method listed is relevant to your study. If you are not sure if a list item applies to your research, read the appropriate section before selecting a response.

### Materials & experimental systems

|                                     |                                                      |
|-------------------------------------|------------------------------------------------------|
| n/a                                 | Involved in the study                                |
| <input type="checkbox"/>            | <input checked="" type="checkbox"/> Antibodies       |
| <input checked="" type="checkbox"/> | <input type="checkbox"/> Eukaryotic cell lines       |
| <input checked="" type="checkbox"/> | <input type="checkbox"/> Palaeontology               |
| <input checked="" type="checkbox"/> | <input type="checkbox"/> Animals and other organisms |
| <input checked="" type="checkbox"/> | <input type="checkbox"/> Human research participants |
| <input checked="" type="checkbox"/> | <input type="checkbox"/> Clinical data               |

### Methods

|                                     |                                                    |
|-------------------------------------|----------------------------------------------------|
| n/a                                 | Involved in the study                              |
| <input checked="" type="checkbox"/> | <input type="checkbox"/> ChIP-seq                  |
| <input type="checkbox"/>            | <input checked="" type="checkbox"/> Flow cytometry |
| <input checked="" type="checkbox"/> | <input type="checkbox"/> MRI-based neuroimaging    |

## Antibodies

Antibodies used

All antibodies used for flow cytometry analysis additionally listed in Supplemental Table 6

Antibody Manufacture Clone Cat# Lot#  
 CD14 AF700 BD M5E2 557923 7047605  
 CD14 BV510 BD MOP9 563079 7129954  
 CD19 AF700 BD HIB19 557921 7045883  
 CD19 BV510 BD SJ25C1 562947 6287551  
 CD56 PE-Cy7 BD B159 557747 7319530  
 CD98 PE BD UM7F8 556077 7299909  
 CD107a FITC BD H4A3 555800 4042975  
 Granzyme B AF700 BD GB11 560213 7339825  
 HLA-DR FITC BD G46-6 555811 4342790  
 IFN-g AF647 BD 4S.B3 563495 3221692  
 Ki67 AF488 BD B56 562900 6261744  
 CD3 BV785 Biolegend OKT3 317330 B231963  
 CD38 BV421 Biolegend HIT2 303526 B240476  
 CD38 PE Biolegend HB-7 356604 B189351  
 CD4 PE-Dz594 Biolegend RPA-T4 300548 B200505  
 CD4 BV605 Biolegend RPA-T4 300556 B189700

CD69 APC Biolegend FN50 310910 B176306  
 CD69 APC-Cy7 Biolegend FN50 310914 B195699  
 CD71 PE Biolegend CY1G4 334106 B242701  
 CD8 BV650 Biolegend RPA-T8 301042 B239273  
 HLA-DR BV605 Biolegend L243 307640 B218290  
 CD25 APC Invitrogen BC96 17-0259-42 4300267  
 EOMES eF660 Invitrogen WD192B 50-4877-42 1988006

Validation

Antibody specificity was assessed by the manufacturer. All antibodies were titrated prior to use

## Flow Cytometry

### Plots

Confirm that:

- The axis labels state the marker and fluorochrome used (e.g. CD4-FITC).
- The axis scales are clearly visible. Include numbers along axes only for bottom left plot of group (a 'group' is an analysis of identical markers).
- All plots are contour plots with outliers or pseudocolor plots.
- A numerical value for number of cells or percentage (with statistics) is provided.

### Methodology

Sample preparation

Surface staining for flow cytometry analysis was performed in PBS supplemented with 2% FBS at room temperature. Aqua Live/Dead (ThermoFisher, L34957) was used to exclude dead cells in all experiments. Intracellular protein staining was performed using the Foxp3 Fixation/Permeabilization kit (ThermoFisher, 00-5523-00) according to the manufacturer's recommendation.

Instrument

Flow cytometry analysis was performed on a custom-order BD LSRFortessa instrument. Cell sorting was performed on a BD FACSAria Fusion instrument

Software

Flow cytometry data was collected using BDFACSDiva v6.2 (BD Biosciences) and analyzed using FlowJo v10.2 software (Treestar).

Cell population abundance

The post-sort purity of all samples was assessed immediately after sorting. All post-sort purity assessments shown in the relevant figures

Gating strategy

Viable cells were initially defined by FSC/SSC. Single cells were identified by FSC-H/FSC-H. Viable cells were identified by exclusion of cell viability dye. All additional gating strategies are indicated in the corresponding figure or supplemental figure

- Tick this box to confirm that a figure exemplifying the gating strategy is provided in the Supplementary Information.
